# Supplementary material
Source: HighWire-hosted journal article supplement (https://cmajopen-stage.highwire.org/highwire/filestream/84935/field_highwire_adjunct_files/0/2020-0136-COREQ-checklist.pdf)
Supplement: 2020-0136-COREQ-checklist.pdf [file 2020-0136-COREQ-checklist.pdf]

**Table 2**

Consolidated criteria for reporting qualitative studies (COREQ): 32-item checklist

| No                                                     | Item                    | Guide questions/description                                                                                                                                                                                                |
|--------------------------------------------------------|-------------------------|----------------------------------------------------------------------------------------------------------------------------------------------------------------------------------------------------------------------------|
| <b>Domain 1:<br/>Research team<br/>and reflexivity</b> |                         |                                                                                                                                                                                                                            |
| Personal<br>Characteristics                            |                         |                                                                                                                                                                                                                            |
| 1.                                                     | Interviewer/facilitator | Which author/s conducted the interview or focus group?<br><b>MK and STH (Line 141-142)</b>                                                                                                                                 |
| 2.                                                     | Credentials             | What were the researcher's credentials? <i>E.g. PhD, MD</i><br><b>The interviewers were masters and LLD candidates (Lines 19, 21)</b>                                                                                      |
| 3.                                                     | Occupation              | What was their occupation at the time of the study?<br><b>Students (Lines 19, 21)</b>                                                                                                                                      |
| 4.                                                     | Gender                  | Was the researcher male or female?<br><b>The research team included 4 women and 1 man. The two interviewers were women. We have not included this in the text because we do not feel it is relevant for this research.</b> |
| 5.                                                     | Experience and training | What experience or training did the researcher have?<br><b>Previous qualitative research (Lines 142-143)</b>                                                                                                               |
| Relationship<br>with participants                      |                         |                                                                                                                                                                                                                            |

| No                            | Item                                     | Guide questions/description                                                                                                                                                                                                                                                          |
|-------------------------------|------------------------------------------|--------------------------------------------------------------------------------------------------------------------------------------------------------------------------------------------------------------------------------------------------------------------------------------|
| 6.                            | Relationship established                 | Was a relationship established prior to study commencement?<br><b>No.</b>                                                                                                                                                                                                            |
| 7.                            | Participant knowledge of the interviewer | What did the participants know about the researcher? <i>e.g. personal goals, reasons for doing the research</i><br><b>The invitation to participate included information about the purpose of the study and the backgrounds of the members of the research team (Lines 140-141).</b> |
| 8.                            | Interviewer characteristics              | What characteristics were reported about the interviewer/facilitator? <i>e.g. Bias, assumptions, reasons and interests in the research topic</i><br><b>None.</b>                                                                                                                     |
| <b>Domain 2: study design</b> |                                          |                                                                                                                                                                                                                                                                                      |
| Theoretical framework         |                                          |                                                                                                                                                                                                                                                                                      |
| 9.                            | Methodological orientation and Theory    | What methodological orientation was stated to underpin the study? <i>e.g. grounded theory, discourse analysis, ethnography, phenomenology, content analysis</i><br><b>Abductive reasoning, detailed coding and theme analysis (Line 154)</b>                                         |
| Participant selection         |                                          |                                                                                                                                                                                                                                                                                      |
| 10.                           | Sampling                                 | How were participants selected? <i>e.g. purposive, convenience, consecutive,</i>                                                                                                                                                                                                     |

| No      | Item                             | Guide questions/description                                                                                                                                                                                                                       |
|---------|----------------------------------|---------------------------------------------------------------------------------------------------------------------------------------------------------------------------------------------------------------------------------------------------|
|         |                                  | <i>snowball</i><br>Convenience (Line 138)                                                                                                                                                                                                         |
| 11.     | Method of approach               | How were participants approached?<br><i>e.g. face-to-face, telephone, mail,</i><br>Participants were invited by email via<br>list-serve (Line 140)                                                                                                |
| 12.     | Sample size                      | How many participants were in the<br>study?<br>20 (Line 161)                                                                                                                                                                                      |
| 13.     | Non-participation                | How many people refused to<br>participate or dropped out?<br>Reasons? No drop-outs, the invitation<br>went out to list-serves with a combined<br>total of about 120 members, and 20<br>people responded to the invitation.<br>(Lines 139 and 162) |
| Setting |                                  |                                                                                                                                                                                                                                                   |
| 14.     | Setting of data<br>collection    | Where was the data collected? <i>e.g.</i><br><i>home, clinic, workplace</i><br>By video meeting, phone or email (Line<br>142)                                                                                                                     |
| 15.     | Presence of non-<br>participants | Was anyone else present besides the<br>participants and researchers?<br>No                                                                                                                                                                        |
| 16.     | Description of sample            | What are the important characteristics<br>of the sample? <i>e.g. demographic data,</i><br><i>date</i><br>Date range, occupation, MAiD<br>assessment experience, geographic<br>location, age and sex (Lines 162-171)                               |

| No              | Item                   | Guide questions/description                                                                                               |
|-----------------|------------------------|---------------------------------------------------------------------------------------------------------------------------|
| Data collection |                        |                                                                                                                           |
| 17.             | Interview guide        | Were questions, prompts, guides provided by the authors?<br>Yes (Lines 143-146, Appendix 1)                               |
|                 |                        | Was it pilot tested?<br>It was changed iteratively as the team read transcripts and themes emerged (Lines 149-154).       |
| 18.             | Repeat interviews      | Were repeat interviews carried out? If yes, how many?<br>Yes, 13 participants had a follow-up interview (Lines 151-154)   |
| 19.             | Audio/visual recording | Did the research use audio or visual recording to collect the data?<br>Yes, the interviews were audio recorded (Line 148) |
| 20.             | Field notes            | Were field notes made during and/or after the interview or focus group?<br>No                                             |
| 21.             | Duration               | What was the duration of the interviews or focus group?<br>20-45 minutes (Line 148)                                       |
| 22.             | Data saturation        | Was data saturation discussed?<br>Yes (in results)                                                                        |
| 23.             | Transcripts returned   | Were transcripts returned to participants for comment and/or correction?<br>No                                            |

| No                                         | Item                           | Guide questions/description                                                                                                                                                         |
|--------------------------------------------|--------------------------------|-------------------------------------------------------------------------------------------------------------------------------------------------------------------------------------|
| <b>Domain 3:<br/>analysis and findings</b> |                                |                                                                                                                                                                                     |
| Data analysis                              |                                |                                                                                                                                                                                     |
| 24.                                        | Number of data coders          | How many data coders coded the data?<br><b>3 (Line 156)</b>                                                                                                                         |
| 25.                                        | Description of the coding tree | Did authors provide a description of the coding tree?<br><b>No</b>                                                                                                                  |
| 26.                                        | Derivation of themes           | Were themes identified in advance or derived from the data?<br><b>Derived from data (Line 154)</b>                                                                                  |
| 27.                                        | Software                       | What software, if applicable, was used to manage the data?<br><b>Stata</b>                                                                                                          |
| 28.                                        | Participant checking           | Did participants provide feedback on the findings?<br><b>No</b>                                                                                                                     |
| Reporting                                  |                                |                                                                                                                                                                                     |
| 29.                                        | Quotations presented           | Were participant quotations presented to illustrate the themes / findings? Was each quotation identified? e.g. <i>participant number</i><br><b>Yes (throughout results section)</b> |
| 30.                                        | Data and findings consistent   | Was there consistency between the data presented and the findings?<br><b>Yes (throughout results section)</b>                                                                       |

| No  | Item                    | Guide questions/description                                                                                           |
|-----|-------------------------|-----------------------------------------------------------------------------------------------------------------------|
| 31. | Clarity of major themes | <p>Were major themes clearly presented in the findings?</p> <p>Yes (Lines 173-175, throughout results section)</p>    |
| 32. | Clarity of minor themes | <p>Is there a description of diverse cases or discussion of minor themes?</p> <p>Yes (throughout results section)</p> |
